# Supplementary material for: GoPros™ as an underwater photogrammetry tool for citizen science
Source: PeerJ. 2016 Apr 25;4:e1960. doi: 10.7717/peerj.1960 (PMC4860335; doi:10.7717/peerj.1960)
Supplement: Supplemental Information 1 [file peerj-04-1960-s001.xlsx]

## Sheet: Sheet4
Count of Total	Column Labels
Row Labels	1	2	Grand Total			Transect	Traditional snorkel	stdev	n	stderr	Structure from motion
1	5	5	10			1	2324	610.969	5	273.234	931.4	98.779	5	44.1753
2	5	5	10			2	1927.6	309.229	5	138.291	1127.6	91.931	5	41.1128
3	5	5	10			3	1010.4	56.9544	5	25.4708	1076	137.708	5	61.5849
4	5	5	10			4	1103.8	116.085	5	51.9147	706	134.406	5	60.1082
5	5	5	10			5	874.2	74.3788	5	33.2632	637.8	163.657	5	73.1898
6	5	5	10			6	788.2	123.912	5	55.4152	565	163.788	5	73.2482
7	5	5	10			7	892.2	223.604	5	99.9987	684.4	145.011	5	64.8511
8	5	5	10			8	776.6	120.372	5	53.8318	680.8	152.813	5	68.3399
9	5	5	10			9	806.4	87.8311	5	39.2793	586.8	83.2298	5	37.2215
10	5	5	10			10	731	55.4211	5	24.7851	621.6	126.429	5	56.5408
11	5	5	10			11	673	66.9515	5	29.9416	548	106.668	5	47.7032
12	5	5	10			12	641.8	73.5778	5	32.905	609.6	91.3499	5	40.8529
Grand Total	60	60	120

## Sheet: Sheet1
By People									By Method									By Transect
			Time (seconds)				Key					Time (seconds)				Key					Time (seconds)
Method	Transect	People	ID	Holo	CW	Total	Method	1=Snorkel	Method	Transect	People	ID	Holo	CW	Total	Method	1=Snorkel	Method	Transect	People	ID	Holo	CW	Total
1	1	1	634	159	620	1413		2=GoPro	1	1	1	634	159	620	1413		2=GoPro	1	1	1	634	159	620	1413
1	2	1	590	465	673	1728	People	1=Pete	1	1	2	1960	490	594	3044	People	1=Pete	1	1	2	1960	490	594	3044
1	3	1	399	117	411	927		2=Ciaran	1	1	3	1184	296	625	2105		2=Ciaran	1	1	3	1184	296	625	2105
1	4	1	360	142	460	962		3=Victoria	1	1	4	1447	362	640	2449		3=Victoria	1	1	4	1447	362	640	2449
1	5	1	268	122	364	754		4=Sam	1	1	5	1306	327	976	2609		4=Sam	1	1	5	1306	327	976	2609
1	6	1	272	100	264	636		5=Sally	1	2	1	590	465	673	1728		5=Sally	2	1	1	365	167	485	1017
1	7	1	82	135	316	533			1	2	2	782	218	776	1776			2	1	2	351	104	526	981
1	8	1	195	90	300	585			1	2	3	682	177	800	1659			2	1	3	369	115	378	862
1	9	1	313	97	306	716			1	2	4	855	687	529	2071			2	1	4	410	81	302	793
1	10	1	220	95	330	645			1	2	5	1116	699	589	2404			2	1	5	358	96	550	1004
1	11	1	219	90	286	595			1	3	1	399	117	411	927			1	2	1	590	465	673	1728
1	12	1	205	107	255	567			1	3	2	388	221	446	1055			1	2	2	782	218	776	1776
2	1	1	365	167	485	1017			1	3	3	404	165	406	975			1	2	3	682	177	800	1659
2	2	1	446	172	559	1177			1	3	4	434	142	468	1044			1	2	4	855	687	529	2071
2	3	1	293	130	500	923			1	3	5	463	137	451	1051			1	2	5	1116	699	589	2404
2	4	1	240	104	335	679			1	4	1	360	142	460	962			2	2	1	446	172	559	1177
2	5	1	178	52	191	421			1	4	2	383	216	488	1087			2	2	2	408	107	467	982
2	6	1	139	43	233	415			1	4	3	598	171	511	1280			2	2	3	539	142	430	1111
2	7	1	238	67	234	539			1	4	4	487	142	500	1129			2	2	4	604	149	473	1226
2	8	1	246	79	210	535			1	4	5	530	123	408	1061			2	2	5	581	86	475	1142
2	9	1	175	52	288	515			1	5	1	268	122	364	754			1	3	1	399	117	411	927
2	10	1	194	59	217	470			1	5	2	334	123	421	878			1	3	2	388	221	446	1055
2	11	1	209	45	187	441			1	5	3	356	30	482	868			1	3	3	404	165	406	975
2	12	1	205	65	253	523			1	5	4	340	121	467	928			1	3	4	434	142	468	1044
1	1	2	1960	490	594	3044			1	5	5	421	130	392	943			1	3	5	463	137	451	1051
1	2	2	782	218	776	1776			1	6	1	272	100	264	636			2	3	1	293	130	500	923
1	3	2	388	221	446	1055			1	6	2	285	125	360	770			2	3	2	415	117	475	1007
1	4	2	383	216	488	1087			1	6	3	360	95	519	974			2	3	3	752	118	406	1276
1	5	2	334	123	421	878			1	6	4	295	95	350	740			2	3	4	518	108	522	1148
1	6	2	285	125	360	770			1	6	5	231	113	477	821			2	3	5	314	103	609	1026
1	7	2	221	213	425	859			1	7	1	82	135	316	533			1	4	1	360	142	460	962
1	8	2	259	126	480	865			1	7	2	221	213	425	859			1	4	2	383	216	488	1087
1	9	2	276	107	340	723			1	7	3	395	130	539	1064			1	4	3	598	171	511	1280
1	10	2	302	111	304	717			1	7	4	368	138	407	913			1	4	4	487	142	500	1129
1	11	2	230	86	318	634			1	7	5	371	188	533	1092			1	4	5	530	123	408	1061
1	12	2	232	112	350	694			1	8	1	195	90	300	585			2	4	1	240	104	335	679
2	1	2	351	104	526	981			1	8	2	259	126	480	865			2	4	2	209	76	308	593
2	2	2	408	107	467	982			1	8	3	290	85	400	775			2	4	3	242	55	273	570
2	3	2	415	117	475	1007			1	8	4	326	101	465	892			2	4	4	468	68	275	811
2	4	2	209	76	308	593			1	8	5	180	186	400	766			2	4	5	360	71	446	877
2	5	2	198	71	403	672			1	9	1	313	97	306	716			1	5	1	268	122	364	754
2	6	2	176	64	409	649			1	9	2	276	107	340	723			1	5	2	334	123	421	878
2	7	2	297	95	410	802			1	9	3	372	95	392	859			1	5	3	356	30	482	868
2	8	2	218	65	426	709			1	9	4	378	133	409	920			1	5	4	340	121	467	928
2	9	2	219	74	334	627			1	9	5	341	113	360	814			1	5	5	421	130	392	943
2	10	2	239	76	333	648			1	10	1	220	95	330	645			2	5	1	178	52	191	421
2	11	2	188	62	275	525			1	10	2	302	111	304	717			2	5	2	198	71	403	672
2	12	2	225	57	327	609			1	10	3	283	80	395	758			2	5	3	196	77	328	601
1	1	3	1184	296	625	2105			1	10	4	304	119	370	793			2	5	4	310	73	235	618
1	2	3	682	177	800	1659			1	10	5	214	116	412	742			2	5	5	293	89	495	877
1	3	3	404	165	406	975			1	11	1	219	90	286	595			1	6	1	272	100	264	636
1	4	3	598	171	511	1280			1	11	2	230	86	318	634			1	6	2	285	125	360	770
1	5	3	356	30	482	868			1	11	3	253	101	337	691			1	6	3	360	95	519	974
1	6	3	360	95	519	974			1	11	4	222	120	330	672			1	6	4	295	95	350	740
1	7	3	395	130	539	1064			1	11	5	242	115	416	773			1	6	5	231	113	477	821
1	8	3	290	85	400	775			1	12	1	205	107	255	567			2	6	1	139	43	233	415
1	9	3	372	95	392	859			1	12	2	232	112	350	694			2	6	2	176	64	409	649
1	10	3	283	80	395	758			1	12	3	222	102	365	689			2	6	3	161	44	229	434
1	11	3	253	101	337	691			1	12	4	207	89	260	556			2	6	4	215	55	250	520
1	12	3	222	102	365	689			1	12	5	225	102	376	703			2	6	5	291	85	431	807
2	1	3	369	115	378	862			2	1	1	365	167	485	1017			1	7	1	82	135	316	533
2	2	3	539	142	430	1111			2	1	2	351	104	526	981			1	7	2	221	213	425	859
2	3	3	752	118	406	1276			2	1	3	369	115	378	862			1	7	3	395	130	539	1064
2	4	3	242	55	273	570			2	1	4	410	81	302	793			1	7	4	368	138	407	913
2	5	3	196	77	328	601			2	1	5	358	96	550	1004			1	7	5	371	188	533	1092
2	6	3	161	44	229	434			2	2	1	446	172	559	1177			2	7	1	238	67	234	539
2	7	3	225	87	327	639			2	2	2	408	107	467	982			2	7	2	297	95	410	802
2	8	3	266	92	326	684			2	2	3	539	142	430	1111			2	7	3	225	87	327	639
2	9	3	222	55	284	561			2	2	4	604	149	473	1226			2	7	4	210	74	288	572
2	10	3	224	53	304	581			2	2	5	581	86	475	1142			2	7	5	330	101	439	870
2	11	3	172	101	337	610			2	3	1	293	130	500	923			1	8	1	195	90	300	585
2	12	3	218	82	342	642			2	3	2	415	117	475	1007			1	8	2	259	126	480	865
1	1	4	1447	362	640	2449			2	3	3	752	118	406	1276			1	8	3	290	85	400	775
1	2	4	855	687	529	2071			2	3	4	518	108	522	1148			1	8	4	326	101	465	892
1	3	4	434	142	468	1044			2	3	5	314	103	609	1026			1	8	5	180	186	400	766
1	4	4	487	142	500	1129			2	4	1	240	104	335	679			2	8	1	246	79	210	535
1	5	4	340	121	467	928			2	4	2	209	76	308	593			2	8	2	218	65	426	709
1	6	4	295	95	350	740			2	4	3	242	55	273	570			2	8	3	266	92	326	684
1	7	4	368	138	407	913			2	4	4	468	68	275	811			2	8	4	233	63	262	558
1	8	4	326	101	465	892			2	4	5	360	71	446	877			2	8	5	341	100	477	918
1	9	4	378	133	409	920			2	5	1	178	52	191	421			1	9	1	313	97	306	716
1	10	4	304	119	370	793			2	5	2	198	71	403	672			1	9	2	276	107	340	723
1	11	4	222	120	330	672			2	5	3	196	77	328	601			1	9	3	372	95	392	859
1	12	4	207	89	260	556			2	5	4	310	73	235	618			1	9	4	378	133	409	920
2	1	4	410	81	302	793			2	5	5	293	89	495	877			1	9	5	341	113	360	814
2	2	4	604	149	473	1226			2	6	1	139	43	233	415			2	9	1	175	52	288	515
2	3	4	518	108	522	1148			2	6	2	176	64	409	649			2	9	2	219	74	334	627
2	4	4	468	68	275	811			2	6	3	161	44	229	434			2	9	3	222	55	284	561
2	5	4	310	73	235	618			2	6	4	215	55	250	520			2	9	4	245	65	209	519
2	6	4	215	55	250	520			2	6	5	291	85	431	807			2	9	5	266	61	385	712
2	7	4	210	74	288	572			2	7	1	238	67	234	539			1	10	1	220	95	330	645
2	8	4	233	63	262	558			2	7	2	297	95	410	802			1	10	2	302	111	304	717
2	9	4	245	65	209	519			2	7	3	225	87	327	639			1	10	3	283	80	395	758
2	10	4	245	73	275	593			2	7	4	210	74	288	572			1	10	4	304	119	370	793
2	11	4	242	42	181	465			2	7	5	330	101	439	870			1	10	5	214	116	412	742
2	12	4	231	64	234	529			2	8	1	246	79	210	535			2	10	1	194	59	217	470
1	1	5	1306	327	976	2609			2	8	2	218	65	426	709			2	10	2	239	76	333	648
1	2	5	1116	699	589	2404			2	8	3	266	92	326	684			2	10	3	224	53	304	581
1	3	5	463	137	451	1051			2	8	4	233	63	262	558			2	10	4	245	73	275	593
1	4	5	530	123	408	1061			2	8	5	341	100	477	918			2	10	5	287	66	463	816
1	5	5	421	130	392	943			2	9	1	175	52	288	515			1	11	1	219	90	286	595
1	6	5	231	113	477	821			2	9	2	219	74	334	627			1	11	2	230	86	318	634
1	7	5	371	188	533	1092			2	9	3	222	55	284	561			1	11	3	253	101	337	691
1	8	5	180	186	400	766			2	9	4	245	65	209	519			1	11	4	222	120	330	672
1	9	5	341	113	360	814			2	9	5	266	61	385	712			1	11	5	242	115	416	773
1	10	5	214	116	412	742			2	10	1	194	59	217	470			2	11	1	209	45	187	441
1	11	5	242	115	416	773			2	10	2	239	76	333	648			2	11	2	188	62	275	525
1	12	5	225	102	376	703			2	10	3	224	53	304	581			2	11	3	172	101	337	610
2	1	5	358	96	550	1004			2	10	4	245	73	275	593			2	11	4	242	42	181	465
2	2	5	581	86	475	1142			2	10	5	287	66	463	816			2	11	5	261	57	381	699
2	3	5	314	103	609	1026			2	11	1	209	45	187	441			1	12	1	205	107	255	567
2	4	5	360	71	446	877			2	11	2	188	62	275	525			1	12	2	232	112	350	694
2	5	5	293	89	495	877			2	11	3	172	101	337	610			1	12	3	222	102	365	689
2	6	5	291	85	431	807			2	11	4	242	42	181	465			1	12	4	207	89	260	556
2	7	5	330	101	439	870			2	11	5	261	57	381	699			1	12	5	225	102	376	703
2	8	5	341	100	477	918			2	12	1	205	65	253	523			2	12	1	205	65	253	523
2	9	5	266	61	385	712			2	12	2	225	57	327	609			2	12	2	225	57	327	609
2	10	5	287	66	463	816			2	12	3	218	82	342	642			2	12	3	218	82	342	642
2	11	5	261	57	381	699			2	12	4	231	64	234	529			2	12	4	231	64	234	529
2	12	5	305	51	389	745			2	12	5	305	51	389	745			2	12	5	305	51	389	745

## Sheet: Sheet3
	Transect	Pete	Ciaran	Vic	Nic	Sam	Sally
	1	1413	3044	2105	2028	2449	2609
	2	1728	1776	1659	1764	2071	2404
	3	1287	1290	2084	1403	1663	1436
	4	927	1055	975	889	1044	1051
	5	962	1087	1280	943	1129	1061
	6	754	878	868	901	928	943
	7	636	770	974	827	740	821
	8	533	859	1064	991	913	1092
	9	585	865	775	766	892	766
	10	716	723	859	661	920	814
	11	645	717	758	732	793	742
	12	595	634	691	702	672	773
	13	567	694	689	685	556	703
