# Supplementary material for: GoPros™ as an underwater photogrammetry tool for citizen science
Source: PeerJ. 2016 Apr 25;4:e1960. doi: 10.7717/peerj.1960 (PMC4860335; doi:10.7717/peerj.1960)
Supplement: Supplemental Information 2 [file peerj-04-1960-s002.xlsx]

## Sheet: Sheet5
T Test: Two Independent Samples
SUMMARY			Hyp Mean Diff	0
Groups	Count	Mean	Variance	Cohen d
Snorkel	60	4.49633	0.174468
GoPro	60	4.62633	0.327539
Pooled			0.251003	0.25948
T TEST: Equal Variances				Alpha	0.05
	std err	t-stat	df	p-value	t-crit	lower	upper	sig	effect r
One Tail	0.0914701	1.42123	118	0.0789437	1.65787			no	0.129729
Two Tail	0.0914701	1.42123	118	0.157887	1.98027	-0.311136	0.0511357	no	0.129729
T TEST: Unequal Variances				Alpha	0.05
	std err	t-stat	df	p-value	t-crit	lower	upper	sig	effect r
One Tail	0.0914701	1.42123	107.962	0.079066	1.65909			no	0.13552
Two Tail	0.0914701	1.42123	107.962	0.158132	1.98217	-0.31131	0.0513096	no	0.13552

## Sheet: Sheet1
Snorkel	GoPro		Test	Paired t-test		Darkest
2.05	2.25		T value	-7.89		Snorkel	GoPro		Test	Paired t-test
1.85	2.55		df	59		4.8	4.45		T value	-2.05
2.3	2.15		P (one tailed)	<0.0001		4.5	5.1		df	59			Mean lightest coral	Mean darkest coral
2.4	2.1					4.8	4.4		P (one tailed)	0.0224085		Snorkel	2.36	4.5	0.0623449	0.0539535
2.1	1.8		Snorkel	2.36		5	4.65					GoPro	2.76	4.63	0.0789127	0.0738833
1.54	2.25		GoPro	2.76		5.1	4.95		Mean Snorkel	4.5
1.6	2					4.69	5.3		Mean GoPro	4.63
2	2.5		Std Dev Snorkel	0.482922		5.15	5.25
2	1.75		Std Dev GoPro	0.611255		4.6	5.45		Std Dev Snorkel	0.417922
1.9	2.2					5	5		Std Dev GoPro	0.572297
1.7	2.25		Std Error Snorkel	0.0623449		4.4	5.05
1.26	1.95		Std Error GoPro	0.0789127		5	5.15		Std Error Snorkel	0.0539535
2.4	2.3					4.42	5.3		Std Error GoPro	0.0738833
2.3	2.4					4.25	4.3
2.8	2					4.55	4.1
2.3	2.55					4.4	3.75
2.35	2.65					4.3	4.15
2.3	3.6					4.4	4.4
2.35	2.45					3.85	4.8
2.47	2.3					4.5	4.2
2.35	3.05					4.37	4.4
2.35	2.8					4.18	4.45
2.15	2.6					4.12	4.5
2.24	2.7					4.3	4.2
2.25	2.6					4.12	4.2
2.35	2.75					4.65	4.6
2.25	2.65					4.55	4.65
2.85	2.75					5.05	5
2.35	3					5	4.7
2.5	3					4.85	5.1
2.05	2.9					4.95	4.93
2.4	3					4.55	5.3
2.35	2.85					5.35	5.4
2.4	3.25					4.9	4.95
2.45	3.65					5	5.5
2.61	2.75					4.75	5.75
1.8	1.85					5.22	4.95
1.7	2.3					3.7	3.7
2.5	2.5					3.55	4.25
2.4	2.5					4.6	3.7
2.05	2.4					4.3	3.8
2.19	2.05					4.15	3.55
2.1	2.6					4.25	3.65
1.95	2.45					3.95	4.2
2.1	2.45					4.1	3.65
1.95	2.65					3.85	3.8
1.95	2.5					4	3.55
2.1	2.95					4.25	4.2
2.8	3.15					3.6	4.15
2.85	3.3					4.6	4.3
3.2	3.5					4.68	4.25
3.11	3.55					4.85	4.7
3	3.8					4.35	4.95
2.85	4					4.3	4.95
3.5	4					4.21	5.15
3.7	4					4.6	5.15
2.8	3.6					5	5.1
2.75	3.8					4.05	4.75
3.5	4					4	5.3
3.1	3.6					4.8	5.35
						4.42	5.1
Darkest
Snorkel	GoPro		Test	Paired t-test
4.8	4.45		T value	-2.05
4.5	5.1		df	59
4.8	4.4		P (one tailed)	0.0224085
5	4.65
5.1	4.95		Mean Snorkel	4.5
4.69	5.3		Mean GoPro	4.63
5.15	5.25
4.6	5.45		Std Dev Snorkel	0.417922
5	5		Std Dev GoPro	0.572297
4.4	5.05
5	5.15		Std Error Snorkel	0.0539535
4.42	5.3		Std Error GoPro	0.0738833
4.25	4.3
4.55	4.1
4.4	3.75
4.3	4.15
4.4	4.4
3.85	4.8
4.5	4.2
4.37	4.4
4.18	4.45
4.12	4.5
4.3	4.2
4.12	4.2
4.65	4.6
4.55	4.65
5.05	5
5	4.7
4.85	5.1
4.95	4.93
4.55	5.3
5.35	5.4
4.9	4.95
5	5.5
4.75	5.75
5.22	4.95
3.7	3.7
3.55	4.25
4.6	3.7
4.3	3.8
4.15	3.55
4.25	3.65
3.95	4.2
4.1	3.65
3.85	3.8
4	3.55
4.25	4.2
3.6	4.15
4.6	4.3
4.68	4.25
4.85	4.7
4.35	4.95
4.3	4.95
4.21	5.15
4.6	5.15
5	5.1
4.05	4.75
4	5.3
4.8	5.35
4.42	5.1
