# Supplementary material for: GoPros™ as an underwater photogrammetry tool for citizen science
Source: PeerJ. 2016 Apr 25;4:e1960. doi: 10.7717/peerj.1960 (PMC4860335; doi:10.7717/peerj.1960)
Supplement: Supplemental Information 3 [file peerj-04-1960-s003.xlsx]

## Sheet: S. D
Observer	DTrans1	DTrans2	DTrans3	DTrans4	DTrans5	DTrans6	DTrans7	DTrans8	DTrans9	DTrans10	DTrans11	DTrans12
Ciaran	21	16	12	17	16	15	16	13	15	14	14	13
Pete	18	17	15	18	14	13	14	12	14	13	12	10
Sally	10	15	13	14	12	12	11	14	13	12	12	12
Sam	20	17	19	18	15	11	15	15	14	13	11	9
Victoria	15	14	13	15	15	16	15	13	12	12	12	12
MEAN	16.8	15.8	14.4	16.4	14.4	13.4	14.2	13.4	13.6	12.8	12.2	11.2
SE	1.687	0.667	1.025
MEAN (n5)	16.8	15.8	14.4			T Test: Two Independent Samples
se(n5)	1.985	0.583	1.249
	Snorkel	GoPro				SUMMARY			Hyp Mean Diff	0
	16.8	10.8				Groups	Count	Mean	Variance	Cohen d
	15.8	9.6				Snorkel	12	14.05	2.77909
	14.4	10.6				GoPro	12	10.55	1.00455
	16.4	12.2				Pooled			1.89182	2.54465
	14.4	11
	13.4	10.4				T TEST: Equal Variances				Alpha	0.05
	14.2	10.6					std err	t-stat	df	p-value	t-crit	lower	upper	sig	effect r
	13.4	8.6				One Tail	0.561519	6.2331	22	1.41943e-06	1.71714			yes	0.79904
	13.6	11.4				Two Tail	0.561519	6.2331	22	2.83887e-06	2.07387	2.33548	4.66452	yes	0.79904
	12.8	11.4
	12.2	9.2				T TEST: Unequal Variances				Alpha	0.05
	11.2	10.8					std err	t-stat	df	p-value	t-crit	lower	upper	sig	effect r
						One Tail	0.561519	6.2331	18.0333	3.4791e-06	1.73406			yes	0.82643
						Two Tail	0.561519	6.2331	18.0333	6.9582e-06	2.10092	2.32029	4.67971	yes	0.82643
						Descriptive Statistics				Box Plot				Shapiro-Wilk Test				Outliers and Missing Data
							Snorkel	GoPro			Snorkel	GoPro			Snorkel	GoPro			Snorkel	GoPro
						Mean	14.05	10.55		Min	11.2	8.6		W	0.966486	0.952638		mean	14.05	10.55
						Standard Error	0.481239	0.28933		Q1-Min	2.05	1.6		p-value	0.870744	0.675817		stdev	1.66706	1.00227
						Median	13.9	10.7		Med-Q1	0.65	0.5		alpha	0.05	0.05		# outliers	0	0
						Mode	14.4	10.8		Q3-Med	0.85	0.4		normal	yes	yes		# blank	0	0
						Standard Deviation	1.66706	1.00227		Max-Q3	2.05	1.1						# non-num	0	0
						Sample Variance	2.77909	1.00455										1	1.64961	0.249434
						Kurtosis	-0.409299	0.19847										2	1.04975	-0.947848
						Skewness	0.168337	-0.530163										3	0.20995	0.0498867
						Range	5.6	3.6										4	1.40967	1.64626
						Maximum	16.8	12.2										5	0.20995	0.448981
						Minimum	11.2	8.6										6	-0.389908	-0.14966
						Sum	168.6	126.6										7	0.0899787	0.0498867
						Count	12	12										8	-0.389908	-1.94558
						Geometric Mean	13.9593	10.5047										9	-0.269936	0.848075
						Harmonic Mean	13.8686	10.4577										10	-0.749823	0.848075
						AAD	1.28333	0.733333										11	-1.10974	-1.34694
						MAD	0.8	0.5										12	-1.7096	0.249434
						IQR	1.5	0.9

## Sheet: G. D
Observer	DGTrans1	DGTrans2	DGTrans3	DGTrans4	DGTrans5	DGTrans6	DGTrans7	DGTrans8	DGTrans9	DGTrans10	DGTrans11	DGTrans12
Ciaran	10	9	11	13	10	11	11	7	10	10	7	10
Pete	12	10	11	10	11	10	10	7	11	11	9	10
Sally	9	8	7	13	12	11	11	10	12	12	11	10
Sam	11	10	9	12	13	11	11	9	12	13	9	11
Victoria	12	11	15	13	9	9	10	10	12	11	10	13
MEAN	10.8	9.6	10.6	12.2	11	10.4	10.6	8.6	11.4	11.4	9.2	10.8
STDEV	1.30384	1.14018	2.96648	STD across trans
SE	0.494	0.494	1.116
	1
	1
	#REF!		C	D	G	H	F	E	J	I	L	K
	1
	1
	2.08167
MEAN (n5)	10.8	9.6	10.6
se(n5)	0.583	0.51	1.327

## Sheet: S. C
Observer	CTrans1	CTrans2	CTrans3	CTrans4	CTrans5	CTrans6	CTrans7	CTrans8	CTrans9	CTrans10	CTrans11	CTrans12
Ciaran	16.7447	21.2058	11.5296	10.3673	10.4929	8.45088	15.1739	19.5721	12.315	14.294	12.755	11.184
Pete	16.745	18.975	6.786	9.142	9.393	9.016	9.079	8.262	12.975	12.127	12.189	13.635
Sally	18.881	16.3677	10.8699	21.2372	12.9119	9.17345	8.76504	9.205	9.959	10.493	7.885	8.388
Sam	11.9381	19.8234	25.2584	20.7031	16.0221	17.059	18.881	15.519	16.493	14.86	13.666	16.713
Victoria	17.8442	20.7031	13.2261	18.2527	15.1425	14.1686	16.0535	17.4673	12.3465	15.519	13.163	14.985
Mean	16.4306	19.415	13.534	15.9404	12.7925	11.5736	13.5905	14.0051	12.8177	13.4586	11.9316	12.981
whole mean	14.0392
stderr	0.637911
	Snorkel	GoPro			Descriptive Statistics				Box Plot				Shapiro-Wilk Test				Outliers and Missing Data
	16.4306	15.6262
	19.415	16.8198				Snorkel	GoPro			Snorkel	GoPro			Snorkel	GoPro			Snorkel	GoPro
	13.534	16.77			Mean	14.0392	12.6729		Min	11.5736	8.1556		W	0.854395	0.946191		mean	14.0392	12.6729
	15.9404	12.9432			Standard Error	0.637911	0.774983		Q1-Min	1.23782	2.82265		p-value	0.0416157	0.582142		stdev	2.20979	2.68462
	12.7925	11.1086			Median	13.4963	12.2439		Med-Q1	0.684908	1.26565		alpha	0.05	0.05		# outliers	0	0
	11.5736	8.1556			Mode	#N/A	#N/A		Q3-Med	0.992609	2.08855		normal	no	yes		# blank	0	0
	13.5905	10.5872			Standard Deviation	2.20979	2.68462		Max-Q3	4.92608	2.48735						# non-num	0	0
	14.0051	11.2532			Sample Variance	4.88317	7.20718										1	1.08217	1.10009
	12.8177	11.8334			Kurtosis	2.20306	-0.613152										2	2.43271	1.5447
	13.4586	10.4216			Skewness	1.47794	0.269411										3	-0.22862	1.52615
	11.9316	13.9012			Range	7.84142	8.6642										4	0.860362	0.100697
	12.981	12.6544			Maximum	19.415	16.8198										5	-0.564182	-0.582677
					Minimum	11.5736	8.1556										6	-1.11578	-1.68265
					Sum	168.471	152.074										7	-0.20306	-0.776895
					Count	12	12										8	-0.0154494	-0.528815
					Geometric Mean	13.8955	12.4112										9	-0.552774	-0.312695
					Harmonic Mean	13.766	12.1493										10	-0.262747	-0.83858
					AAD	1.6114	2.11601										11	-0.953763	0.457545
					MAD	0.69121	1.657										12	-0.478876	-0.00687869
					IQR	1.67752	3.3542
		T Test: Two Independent Samples
		SUMMARY			Hyp Mean Diff	0
		Groups	Count	Mean	Variance	Cohen d
		Snorkel	12	14.0392	4.88317
		GoPro	12	12.6729	7.20718
		Pooled			6.04517	0.555722
		T TEST: Equal Variances				Alpha	0.05
			std err	t-stat	df	p-value	t-crit	lower	upper	sig	effect r
		One Tail	1.00376	1.36123	22	0.0936102	1.71714			no	0.278716
		Two Tail	1.00376	1.36123	22	0.18722	2.07387	-0.715316	3.44801	no	0.278716
		T TEST: Unequal Variances				Alpha	0.05
			std err	t-stat	df	p-value	t-crit	lower	upper	sig	effect r
		One Tail	1.00376	1.36123	21.2161	0.0938617	1.72074			no	0.283412
		Two Tail	1.00376	1.36123	21.2161	0.187723	2.07961	-0.721079	3.45378	no	0.283412

## Sheet: G. C
Observer	CGTrans1	CGTrans2	CGTrans3	CGTrans4	CGTrans5	CGTrans6	CGTrans7	CGTrans8	CGTrans9	CGTrans10	CGTrans11	CGTrans12
Ciaran	13.258	14.765	12.881	13.666	11.624	9.205	15.928	11.812	15.3	11.655	20.263	13.886
Pete	15.959	13.446	10.996	12.252	11.781	5.749	10.776	11.938	12.315	10.357	14.12	15.237
Sally	15.959	17.687	15.048	13.32	11.121	9.959	10.21	11.498	10.032	9.676	12.032	10.493
Sam	17.844	24.441	29.468	14.043	12.88	10.022	9.99	10.776	9.708	14.451	15.677	16.399
Victoria	15.111	13.76	15.457	11.435	8.137	5.843	6.032	10.242	11.812	5.969	7.414	7.257
MEAN	15.6262	16.8198	16.77	12.9432	11.1086	8.1556	10.5872	11.2532	11.8334	10.4216	13.9012	12.6544
Mean total	12.6729
stderr	0.774983
